# Supplementary material
Source: publisher figshare collection journal article supplement (https://future-science-group.figshare.com/articles/dataset/_/23607909)
Supplement: Supplementary file 1 [file 1]

**Table S2**. Patient characteristics in the with- and without-molecularly-targeted agent (MTA) subgroups.

|  | **Without MTA** | **With MTA** | ***p*-value** |
| --- | --- | --- | --- |
| All | 956 | 2873 |  |
| Age at first-line treatment, years |  |  |  |
| Median [range] | 68.0 [21.0-88.0] | 66.0 [23.0-90.0] | < 0.001 |
| <70 years | 549 (57.4) | 1853 (64.5) | < 0.001 |
| ≥70 years | 407 (42.6) | 1020 (35.5) |  |
| Sex |  |  |  |
| Male | 570 (59.6) | 1736 (60.4) | 0.689 |
| Female | 386 (40.4) | 1137 (39.6) |  |
| Hospital scale |  |  |  |
| <500 beds | 642 (67.2) | 1795 (62.5) | 0.010 |
| ≥500 beds | 314 (32.8) | 1078 (37.5) |  |
| Cancer hospital |  |  |  |
| Yes | 687 (71.9) | 2174 (75.7) | 0.021 |
| No | 269 (28.1) | 699 (24.3) |  |
| Location of primary tumor |  |  |  |
| Right | 304 (31.8) | 793 (27.6) | 0.012* |
| Left | 562 (58.8) | 1810 (63.0) |  |
| Both | 14 (1.5) | 40 (1.4) |  |
| Unknown | 76 (7.9) | 230 (8.0) |  |
| Starting date of first-line treatment |  |  |  |
| 2008−2014 | 275 (28.8) | 834 (29.0) | 0.909 |
| 2015−2019 | 681 (71.2) | 2039 (71.0) |  |
| ADL at first-line treatment |  |  |  |
| Barthel Index |  |  |  |
| <100 | 152 (15.9) | 247 (8.6) | < 0.001 |
| 100 | 756 (79.1) | 2567 (89.3) |  |
| Unknown | 48 (5.0) | 59 (2.1) |  |
| Patient’s independence |  |  |  |
| Feeding |  |  |  |
| Unable | 20 (2.1) | 23 (0.8) | < 0.001 |
| Needs help | 45 (4.7) | 53 (1.8) |  |
| Independent | 878 (91.8) | 2783 (96.9) |  |
| Unknown | 13 (1.4) | 14 (0.5) |  |
| Transfers (bed to chair and back) |  |  |  |
| Unable | 26 (2.7) | 33 (1.1) | < 0.001 |
| Needs major help | 18 (1.9) | 10 (0.3) |  |
| Needs minor help | 91 (9.5) | 140 (4.9) |  |
| Independent | 815 (85.3) | 2683 (93.4) |  |
| Unknown | 6 (0.6) | 7 (0.2) |  |
| Grooming |  |  |  |
| Unable | 79 (8.3) | 92 (3.2) | < 0.001 |
| Independent | 866 (90.6) | 2772 (96.5) |  |
| Unknown | 11 (1.2) | 9 (0.3) |  |
| Toilet use |  |  |  |
| Unable | 37 (3.9) | 45 (1.6) | < 0.001 |
| Needs help | 61 (6.4) | 86 (3.0) |  |
| Independent | 850 (88.9) | 2735 (95.2) |  |
| Unknown | 8 (0.8) | 7 (0.2) |  |
| Bathing |  |  |  |
| Unable | 116 (12.1) | 153 (5.3) | < 0.001 |
| Independent | 811 (84.8) | 2691 (93.7) |  |
| Unknown | 29 (3.0) | 29 (1.0) |  |
| Mobility on level surfaces |  |  |  |
| Immobile | 44 (4.6) | 52 (1.8) | < 0.001 |
| Wheelchair | 29 (3.0) | 32 (1.1) |  |
| Helped by one person | 54 (5.6) | 80 (2.8) |  |
| Independent | 818 (85.6) | 2698 (93.9) |  |
| Unknown | 11 (1.2) | 11 (0.4) |  |
| Stairs |  |  |  |
| Unable | 70 (7.3) | 82 (2.9) | < 0.001 |
| Needs help | 57 (6.0) | 96 (3.3) |  |
| Independent | 791 (82.7) | 2650 (92.2) |  |
| Unknown | 38 (4.0) | 45 (1.6) |  |
| Dressing |  |  |  |
| Unable | 34 (3.6) | 37 (1.3) | < 0.001 |
| Needs help | 92 (9.6) | 129 (4.5) |  |
| Independent | 820 (85.8) | 2697 (93.9) |  |
| Unknown | 10 (1.0) | 10 (0.3) |  |
| Bowel control |  |  |  |
| Incontinent | 36 (3.8) | 39 (1.4) | < 0.001 |
| Occasional accident | 26 (2.7) | 45 (1.6) |  |
| Continent | 885 (92.6) | 2775 (96.6) |  |
| Unknown | 9 (0.9) | 14 (0.5) |  |
| Bladder control |  |  |  |
| Incontinent | 37 (3.9) | 38 (1.3) | < 0.001 |
| Occasional accident | 22 (2.3) | 39 (1.4) |  |
| Continent | 885 (92.6) | 2782 (96.8) |  |
| Unknown | 12 (1.3) | 14 (0.5) |  |

Data are expressed as n (%) or median [range].

MTA, molecular targeted agent; ADL, activities of daily living.

**p*-value for right vs. left tumors.
